# Supplementary material for: CD25890, a conserved protein that modulates sporulation initiation in Clostridioides difficile
Source: PubMed Central journal article supplement (PMC8041843; doi:10.1038/s41598-021-86878-9), 2021-04-12

## Supplementary Information

### **CD25890, a conserved protein that modulates sporulation initiation in *Clostridioides difficile***

Diogo Martins<sup>1</sup>, Michael A. DiCandia<sup>2</sup>, Aristides L. Mendes<sup>1</sup>, Daniela Wetzel<sup>2</sup>, Shonna M. McBride<sup>2</sup>, Adriano O. Henriques<sup>1</sup> and Mónica Serrano<sup>1\*</sup>

<sup>1</sup>Instituto de Tecnologia Química e Biológica António Xavier, Avenida da República, 2780-157 Oeiras, Portugal

<sup>2</sup>Department of Microbiology and Immunology, Emory University School of Medicine, Atlanta, Georgia, USA

**\*Corresponding author:** Telf. +351-21-4469524; Fax. +351-21-4411277; e-mail address: [serrano@itqb.unl.pt](mailto:serrano@itqb.unl.pt)

**Running title:** Modulation of sporulation initiation in *C. difficile*

**Key words:** Sporulation; *Clostridioides difficile*; Spo0A; YicC-family protein

## Supplementary Information

Figure S5 to S7 correspond to full-length Coomassie-stained gels and full-length blots displayed in Figures 3 to 4.

### Supplementary figures legends

**Figure S1. Genomic signature of sporulation. A:** The inner circle contains the signature defined as those genes present in 90% of sporulating bacteria and in no more than 10% of the remaining bacterial species <sup>1</sup>. The outer circle has the remaining genes identified in a genomic signature of sporulation within the human intestinal microbiome <sup>2</sup>. Both signatures are enriched with known sporulation-associated genes involved in spore morphogenesis and germination. Genes not specifically associated with a sporulation stage or uncharacterized genes are shown inside the circles. The positions of the genes are shown in degrees in the *C. difficile* 630 chromosome. The *CD25890* gene is a signature gene not previously characterized (blue arrow). **B:** Neighbourhood analysis of genes surrounding *CD25890* in the genomes of the indicated sporulating bacteria. Genes are colour coded to indicate conservation in the various genomes. Grey genes are not conserved with other genomes in the *CD25890* neighbourhood.

**Figure S2. Construction of the  $\Delta CD25890$  in-frame deletion mutant using allele-coupled exchange (ACE). A:** PCR fragments A, B and C were obtained with primers pairs P2/P3, P1/P4 and P3/P4, respectively. PCR fragments D and E were obtained with primers P5/P6. Note that following the initial single reciprocal cross-over, only the integration represented first (of the two possible orientations represented) was obtained. The shorter *CD25890* gene (in yellow) represents the allele with an in-frame deletion of codons 5 to 291 of the 293-codon open reading frame. **B:** PCR analysis of the parental 630 $\Delta erm$  strain in comparison

with the *CD25890* deletion mutant ( $\Delta CD25890$ ) and the *CD25890* in trans complementation strain ( $CD25890^C$ , with a copy of the *CD25890* gene at the *pyrE* locus). PCR analysis was performed using the primer pair P3/P4 (for *CD25890* locus verification) and P5/P6 (for *pyrE* locus verification). The position and sizes of the expected products is shown on the right side of the panel (red arrows). The position on molecular size markers (M, in bp) is shown on the left side of the panel.

**C:** Quantification of the expression of the indicated genes (*dapF*, *CD25890* and *gmk*) by qRT-PCR in the WT,  $\Delta CD25890$  mutant and the complemented strain. The graph shows the fold change of the differential expression of *dapF*, *CD25890* and *gmk* between the  $\Delta CD25890$  or the complemented strain and the WT.

**Figure S3. Disruption of the  $\Delta CD25890$  gene has no effect on growth, biofilm formation or toxin production.** **A:** Mean values of the OD<sub>600</sub> measured after crystal violet staining of the mass of biofilm obtained after 24 h in the absence or in the presence of DOC (final concentration of 240  $\mu$ m). One-way ANOVA was performed to determine statistically significant differences. The data represent the mean  $\pm$  SD of at least three independent experiments performed in triplicate. **B:** The WT and the  $\Delta CD25890$  and  $\Delta tcdAB$  mutants were grown in TY and samples were collected 8, 10, 12 and 14 hours after inoculation. Extracts were prepared and proteins (15  $\mu$ g) resolved by SDS-PAGE and subjected to immunoblotting using an anti-TcdA antibody (upper panel). In the bottom panel the same extracts were loaded in a SDS-PAGE and subjected to Coomassie blue staining, as a loading control. The position of molecular weight markers (in kDa) is indicated on the left side of the panels and the arrow on the right indicates the position of TcdA. The parenthesis indicates possible degradation products. **C:** Samples of an SM liquid culture of the wild type strain (WT, 630  $\Delta erm$ ), the  $\Delta CD25890$  mutant and the complementation strain ( $CD25890^C$ ) were collected at 14 hours after inoculation,

stained with the membrane dye FM4-64 and examined by phase contrast and fluorescent microscopy. The numbers in the panels are the percentage of sporulating cells. Data shown are from one representative experiment in which at least 100 cells were analysed for each strain. Scale bar, 1  $\mu\text{m}$ . Images were acquired by Metamorph<sup>TM</sup> (version 5.8; Molecular Devices) **D**: The optical density of cultures of the WT and the  $\Delta CD25890$  strains was measured at 600nm in intervals of 2 hours until 20 hours hour after inoculation. The data represent the mean  $\pm$  standard deviation (SD) of three independent experiments.

**Figure S4. The  $\Delta CD25890$  phenotype in 70:30 sporulation medium. A:** Cells were grown in 70:30 sporulation medium plates and the titer of heat resistant spores and total viable cells measured 12 hours following inoculation. The data in the graph represent the mean and standard deviation of two independent experiments. **B:** Quantitative analysis of the fluorescence intensity (FI.) of *C. difficile* cells carrying a  $P_{spoOA}$ -SNAP<sup>Cd</sup> transcriptional fusion in the WT and congenic  $\Delta CD25890$  mutant. Only cells with no signs of sporulation were quantified. Cells that The cells were collected after 10 h of growth in liquid SM (left) or in plates of 70:30 sporulation medium (right) , stained with TMR-Star, and examined by fluorescence microscopy to monitor SNAP production. Data shown are from one experiment, and are representative of at least three independent experiments. The numbers in the legend represent the mean and the SD of fluorescence intensity. Images were analysed by Metamorph<sup>TM</sup> (version 5.8; Molecular Devices).

**Figure S5. Accumulation of CD25890 during growth.** Full-length Coomassie-stained gels (left) and full-length blots (right) for the panels A and B of Figure 3. The wild type strain (WT), the  $\Delta CD25890$  mutant, the complementation strain ( $CD25890^C$ ) (**A**) and the *spo0A* mutant (**B**) were grown in SM and samples

were collected at 6, 8, 10 and 12 hours after inoculation for western blot analysis using anti-CD25890 antibody (The parenthesis indicates the position of cross-reactive species).

**Figure S6. Increased expression of *spo0A* in the  $\Delta$ CD25890 mutant.**

Full-length Coomassie-stained gels (left) and full-length blots (right) for the panel C of Figure 4. **A and B:** Samples were collected from the wild type strain (WT), the  $\Delta$ CD25890 mutant and the complementation strain (*CD25890<sup>C</sup>*) grown in liquid SM, at the indicated times after inoculation. Extracts were prepared and proteins (15  $\mu$ g) resolved by SDS-PAGE and subjected to immunoblotting using an anti-Spo0A antibody (The parenthesis indicates the position of cross-reactive species, \* degradation products).

**Figure S7. Phosphorylation of Spo0A in the  $\Delta$ CD25890 mutant.**

Full-length blots for the panels A and C of Figure 5. **A:** Samples were collected from the WT and the  $\Delta$ CD25890 mutant grown in liquid SM, at the indicated times after inoculation. Extracts were prepared and proteins (15  $\mu$ g) resolved by Phos-tag SDS-PAGE and subjected to immunoblotting using an anti-Spo0A antibody. In panel B the same extracts were loaded in a SDS-PAGE and subjected to immunoblotting using an anti-FliC antibody, as a loading control. **C:** Extracts were prepared from liquid SM cultures of the *P<sub>tet</sub>-spo0A* and  $\Delta$ CD25890 *P<sub>tet</sub>-spo0A* strains grown in the presence (50 nM) or in the absence of anhydrotetracycline, 8 hours after inoculation. Proteins (15  $\mu$ g) were resolved by Phos-tag SDS-PAGE and subject to immunoblotting using an anti-Spo0A antibody. In **A** and **C:** The faster migrating bands (black arrows) show the unphosphorylated form of Spo0A (Spo0A), and the slower migrating bands indicate the phosphorylated form of Spo0A (Spo0A~P). The samples heated at 100°C for 5 min were loaded as a control for the position of unphosphorylated Spo0A.

## **Supplementary Tables**

**Table S1 – Sporulation efficiency of the  $\Delta CD25890$  mutant.** The total viable cell count and the spore titer was determined 12, 24, 48 and 72 hours following inoculation into SM sporulation medium. The heat resistant spore counts were determined by assessing the CFU/ml before and after incubation at 70°C for 10 min. The results shown are averages and standard deviations for three biological replicates.

|                  | 12h                                   |                                       | 24h                                   |                                       | 48h                                   |                                       | 72h                                   |                                       |
|------------------|---------------------------------------|---------------------------------------|---------------------------------------|---------------------------------------|---------------------------------------|---------------------------------------|---------------------------------------|---------------------------------------|
|                  | Total viable cells                    | Spore titer                           | Total viable cells                    | Spore titer                           | Total viable cells                    | Spore titer                           | Total viable cells                    | Spore titer                           |
| WT               | $1.6 \times 10^8 \pm 7.4 \times 10^7$ | $7.5 \times 10^3 \pm 9.8 \times 10^2$ | $1.7 \times 10^8 \pm 8.7 \times 10^7$ | $1.0 \times 10^4 \pm 1.2 \times 10^3$ | $8.5 \times 10^7 \pm 1.1 \times 10^7$ | $1.3 \times 10^5 \pm 5.1 \times 10^4$ | $1.0 \times 10^7 \pm 1.3 \times 10^6$ | $1.7 \times 10^5 \pm 5.8 \times 10^4$ |
| $\Delta CD25890$ | $1.6 \times 10^8 \pm 2.8 \times 10^7$ | $3.1 \times 10^4 \pm 5.3 \times 10^3$ | $1.3 \times 10^8 \pm 6.5 \times 10^7$ | $8.5 \times 10^4 \pm 6.2 \times 10^4$ | $3.0 \times 10^7 \pm 2.1 \times 10^7$ | $1.5 \times 10^6 \pm 1.0 \times 10^5$ | $3.0 \times 10^7 \pm 9.8 \times 10^6$ | $2.2 \times 10^6 \pm 1.2 \times 10^6$ |
| $CD25890^C$      | $1.6 \times 10^8 \pm 7.1 \times 10^6$ | $1.8 \times 10^4 \pm 7.8 \times 10^3$ | $2.3 \times 10^8 \pm 1.4 \times 10^8$ | $1.5 \times 10^4 \pm 6.8 \times 10^3$ | $3.0 \times 10^7 \pm 1.7 \times 10^7$ | $7.8 \times 10^4 \pm 2.0 \times 10^4$ | $1.0 \times 10^7 \pm 5.3 \times 10^6$ | $6.0 \times 10^4 \pm 2.0 \times 10^4$ |

**Table S2– Sporulation efficiency of the *P<sub>tet</sub>-spo0A* alleles in the wild-type and the  $\Delta CD25890$  mutant.** The total viable cell count and the spore titer was determined 24 hours following inoculation into SM sporulation medium supplemented with 50 nM of anhydrotetracycline. The heat resistant spore count by determining the cfu/mL obtained after treatment at 70°C. The results shown are averages and standard deviations for three biological replicates.

|                                               | Total viable cells                    | Spore titer <sup>141</sup>            |
|-----------------------------------------------|---------------------------------------|---------------------------------------|
| WT <i>P<sub>tet</sub>-spo0A</i>               | $2.1 \times 10^7 \pm 1.3 \times 10^6$ | $6.8 \times 10^6 \pm 1.3 \times 10^5$ |
| $\Delta CD25890$ <i>P<sub>tet</sub>-spo0A</i> | $2.2 \times 10^7 \pm 1.6 \times 10^6$ | $7.6 \times 10^6 \pm 1.7 \times 10^5$ |









| GeneID        | Base mean | log2 (FC) | StdErr   | Wald-Stats | p-value  | p-adj    | Gene ID   | Counts-y1 | Counts-y2 | Counts-wt1 | Counts-wt2 | GeneID         |                                                  |
|---------------|-----------|-----------|----------|------------|----------|----------|-----------|-----------|-----------|------------|------------|----------------|--------------------------------------------------|
| CD630_20541   | 3388,689  | 2,4491154 | 0,328855 | 7,447397   | 9,52E-14 | 9,42E-12 | CD630_205 | 985,2646  | 973,1704  | 5167,241   | 6429,08    | CD630_205      | hypothetical protein                             |
| EBG0000117568 | 961,005   | 2,7381324 | 0,386394 | 7,086382   | 1,38E-12 | 9,72E-11 | EBG000011 | 284,592   | 162,4099  | 2010,694   | 1386,325   | EBG00001175680 |                                                  |
| CD630_33790   | 495,9061  | 2,3011964 | 0,359443 | 6,402122   | 1,53E-10 | 7,12E-09 | CD630_337 | 143,1966  | 165,6323  | 922,9811   | 751,8145   | CD630_337      | conjugative transposon protein                   |
| CD630_33830   | 950,2159  | 2,1386087 | 0,34484  | 6,201741   | 5,58E-10 | 2,37E-08 | CD630_338 | 364,746   | 294,5291  | 1700,611   | 1440,978   | CD630_338      | ATPase                                           |
| CD630_06052   | 5175,903  | 2,0030469 | 0,335211 | 5,975476   | 2,29E-09 | 8,12E-08 | CD630_060 | 2224,501  | 1684,68   | 9098,995   | 7695,435   | CD630_060      | hypothetical protein                             |
| EBG0000117567 | 719268,1  | 2,0929505 | 0,352718 | 5,933782   | 2,96E-09 | 1,00E-07 | EBG000011 | 274987,9  | 236343,8  | 1468729    | 897011,4   | EBG00001175675 |                                                  |
| CD630_00370   | 820,193   | 2,0215244 | 0,345894 | 5,844355   | 5,09E-09 | 1,66E-07 | CD630_003 | 267,4804  | 342,2209  | 1368,725   | 1302,345   | CD630_003      | acetoin dehydrogenase E1 component subunit beta  |
| CD630_33911   | 1006,281  | 2,0876129 | 0,369923 | 5,643375   | 1,67E-08 | 4,73E-07 | CD630_339 | 368,3485  | 342,8653  | 2088,214   | 1225,698   | CD630_339      | hypothetical protein                             |
| CD630_33800   | 329,6459  | 2,1228161 | 0,378394 | 5,610072   | 2,02E-08 | 5,49E-07 | CD630_338 | 120,6814  | 106,3398  | 625,0108   | 466,5516   | CD630_338      | cell wall hydrolase                              |
| CD630_28720   | 185,5775  | 2,2579327 | 0,405231 | 5,57196    | 2,52E-08 | 6,43E-07 | CD630_287 | 53,13584  | 62,51492  | 336,7306   | 289,9285   | CD630_287      | uxaA-D-galactate dehydratase/altronate hydrolase |
| CD630_11031   | 562,9563  | 2,1024641 | 0,380489 | 5,525683   | 3,28E-08 | 7,96E-07 | CD630_110 | 169,3142  | 222,3469  | 1141,008   | 719,1559   | CD630_110      | Transposon protein                               |
| CD630_01721   | 78572,74  | 2,0393905 | 0,37383  | 5,455399   | 4,89E-08 | 1,16E-06 | CD630_017 | 37355,4   | 19806,27  | 144699,7   | 112429,6   | CD630_017      | ferredoxin                                       |
| CD630_33810   | 774,1556  | 2,0296647 | 0,373064 | 5,440521   | 5,31E-08 | 1,25E-06 | CD630_338 | 261,1762  | 304,1963  | 1579,485   | 951,7652   | CD630_338      | pseudogene                                       |
| CD630_31001   | 297,999   | 2,1744729 | 0,403365 | 5,390838   | 7,01E-08 | 1,59E-06 | CD630_310 | 111,6753  | 84,42737  | 615,3207   | 380,5728   | CD630_310      | hypothetical protein                             |
| CD630_26000   | 5442,931  | 2,2008025 | 0,416131 | 5,28872    | 1,23E-07 | 2,62E-06 | CD630_260 | 2106,521  | 1402,397  | 5278,677   | 12984,13   | CD630_260      | cstA Carbon starvation IID                       |
| CD630_14150   | 246,4029  | 2,7815404 | 0,537831 | 5,171777   | 2,32E-07 | 4,52E-06 | CD630_141 | 40,52734  | 54,13663  | 750,982    | 139,9655   | CD630_141      | membrane protein                                 |
| CD630_33350   | 146,735   | 2,1940253 | 0,458296 | 4,787356   | 1,69E-06 | 2,61E-05 | CD630_333 | 33,32248  | 58,00354  | 307,6604   | 187,9536   | CD630_333      | conjugative transposon protein                   |
| CD630_28700   | 103,0117  | 2,1143094 | 0,45109  | 4,687115   | 2,77E-06 | 4,03E-05 | CD630_287 | 32,42187  | 36,09109  | 169,5766   | 173,9571   | CD630_287      | 2-keto-3-deoxygluconate permease                 |
| CD630_33780   | 52,93474  | 2,3099151 | 0,566148 | 4,080057   | 4,50E-05 | 0,00044  | CD630_337 | 9,006075  | 18,04554  | 118,7036   | 65,98372   | CD630_337      | conjugative transposon protein                   |
| CD630_03700   | 58,67486  | 2,0357824 | 0,523691 | 3,887375   | 0,000101 | 0,000857 | CD630_037 | 22,51519  | 16,75658  | 84,78829   | 110,6394   | CD630_037      | HTH-type transcriptional regulator               |
| CD630_20451   | 55,0322   | 2,2873115 | 0,646369 | 3,538706   | 0,000402 | 0,002697 | CD630_204 | 5,403645  | 19,33451  | 164,7315   | 30,6591    | CD630_204      | hypothetical protein                             |

**Table S3. Summary of RNA-Seq data analysis.**

**Table S4– Sporulation efficiency of the *P<sub>tet</sub>-sinRR'* alleles in wild type and  $\Delta CD25890$  mutant.** The total viable cell count and the spore titer were determined 24 hours following inoculation into sporulation medium supplemented with 50 nM of anhydrotetracycline. The heat resistant spore count by determining the cfu/mL obtained after treatment at 70°C. The results shown are averages and standard deviations for three biological replicates.

|                                                | Total viable cells                    | Spore titer                           |
|------------------------------------------------|---------------------------------------|---------------------------------------|
| WT vector                                      | $1.2 \times 10^8 \pm 5.8 \times 10^6$ | $5.1 \times 10^5 \pm 2.0 \times 10^5$ |
| $\Delta CD25890$ vector                        | $1.2 \times 10^8 \pm 2.5 \times 10^7$ | $1.8 \times 10^6 \pm 2.5 \times 10^5$ |
| WT <i>P<sub>tet</sub>-sinRR'</i>               | $1.0 \times 10^8 \pm 2.0 \times 10^7$ | $1.7 \times 10^6 \pm 2.1 \times 10^5$ |
| $\Delta CD25890$ <i>P<sub>tet</sub>-sinRR'</i> | $1.2 \times 10^8 \pm 1.0 \times 10^7$ | $2.2 \times 10^6 \pm 1.5 \times 10^5$ |

**Table S5. Bacterial strains used in this study.**

| Strain                     | Genotype and phenotype                                                                                                                                                                                                                              | Origin/Construction |
|----------------------------|-----------------------------------------------------------------------------------------------------------------------------------------------------------------------------------------------------------------------------------------------------|---------------------|
| <b><i>E. coli</i></b>      |                                                                                                                                                                                                                                                     |                     |
| BL21                       | <i>ompT gal dcm lon hsdS<sub>B</sub>(r<sub>B</sub><sup>-</sup>m<sub>B</sub><sup>-</sup>) λ(DE3 [lacI lacUV5-T7p07 ind1 sam7 nin5]) [malB<sup>+</sup>]<sub>K-12</sub>(λ<sup>S</sup>)</i>                                                             | Laboratory Stock    |
| DH5α                       | <i>fhuA2 lac(del)U169 phoA glnV44 Φ80' lacZ(del)M15 gyrA96 recA1 relA1 endA1 thi-1 hsdR17</i>                                                                                                                                                       | Laboratory Stock    |
| HB101 (RP4)                | <i>supE44 aa14 galk2 lacY1 Δ (gpt-proA) 62 rpsL20 (Str<sup>R</sup>)xyl-5 mtl-1 recA13 Δ (mcrC-mrr) hsdS<sub>B</sub>(r<sub>B</sub><sup>-</sup>m<sub>B</sub><sup>-</sup>) RP4 (Tra<sup>+</sup> IncP Ap<sup>R</sup> Km<sup>R</sup> Tc<sup>R</sup>)</i> | Laboratory Stock    |
| <b><i>C. difficile</i></b> |                                                                                                                                                                                                                                                     |                     |
| AHCD 536                   | 630Δ <i>erm</i> Δ <i>spo0A</i>                                                                                                                                                                                                                      | 3                   |
| AHCD591                    | 630Δ <i>erm</i> <i>tcdAB::ermB</i>                                                                                                                                                                                                                  | 4                   |
| AHCD607                    | 630Δ <i>erm</i> P <sub><i>spo0A</i></sub> -SNAP <sup>Cd</sup>                                                                                                                                                                                       | This work           |
| AHCD772                    | 630Δ <i>erm</i> Δ <i>pyrE</i>                                                                                                                                                                                                                       | 5                   |
| AHCD1014                   | 630Δ <i>erm</i> Δ <i>pyrE</i> Δ <i>CD25890</i>                                                                                                                                                                                                      | This work           |
| AHCD1055                   | 630Δ <i>erm</i> Δ <i>CD25890 pyrE::CD25890</i>                                                                                                                                                                                                      | "                   |
| AHCD1077                   | 630Δ <i>erm</i> Δ <i>CD25890</i>                                                                                                                                                                                                                    | "                   |
| AHCD1142                   | 630Δ <i>erm</i> Δ <i>CD25890</i> P <sub><i>spo0A</i></sub> -SNAP <sup>Cd</sup>                                                                                                                                                                      | "                   |
| AHCD1190                   | 630Δ <i>erm</i>                                                                                                                                                                                                                                     | "                   |
| AHCD1263                   | 630Δ <i>erm</i> Δ <i>CD25890</i> P <sub><i>tet</i></sub> - <i>gusA</i>                                                                                                                                                                              | "                   |
| AHCD1272                   | 630Δ <i>erm</i> P <sub><i>tet</i></sub> - <i>gusA</i>                                                                                                                                                                                               | "                   |
| AHCD1274                   | 630Δ <i>erm</i> Δ <i>CD25890</i> <i>spo0A::P<sub>tet</sub>-spo0A</i>                                                                                                                                                                                | "                   |
| AHCD1279                   | 630Δ <i>erm</i> <i>spo0A::P<sub>tet</sub>-spo0A</i>                                                                                                                                                                                                 | "                   |
| AHCD1484                   | 630Δ <i>erm</i> P <sub><i>tet</i></sub> - <i>sinRR'</i>                                                                                                                                                                                             | "                   |
| AHCD1590                   | 630Δ <i>erm</i> Δ <i>CD25890</i> P <sub><i>tet</i></sub> - <i>sinRR'</i>                                                                                                                                                                            | "                   |

**Table S6. Oligonucleotide primers used in this study.**

| Name              | Sequence (5' to 3')                              |
|-------------------|--------------------------------------------------|
| CD25890_AscI_Fwd  | ACAGGCGCGCCATAGAAGATTTTCTGTAGGAG                 |
| CD25890_LHA_Rev   | ATTCTTACTCTATACTTATAGCCATTAATTAACCTCC            |
| CD25890_RHA_Fwd   | ATAGAGTAAGAATACAATATTAGAAGGGG                    |
| CD25890_SbfI_Rev  | CTTCCTGCAGGCTCTTTGAAACAGTCCCTAC                  |
| CD25890_Fwd_BamHI | GAAGGATCCG TAGATACATTAGATGG                      |
| CD25890_Rev_XhoI  | CAACTCGAGCTTTTCCTGCACCTGATGG                     |
| P1                | TTCTTTCTATTCAGCACTGTTATGC                        |
| P2                | CATCAAGAAGAGCGACTTCG                             |
| P3                | GCAATAGATGGAAGATTCGACC                           |
| P4                | GCTACACATACAGGCTTTTCC                            |
| P5                | CAATAATTTTATAACATTAACATGG                        |
| P6                | ATTTACATTTTTTAAGTAACAC                           |
| CD25890_Fw        | <u>CGGAATTC</u> GATATAAAAAATAAATCCTTACC          |
| CD25890_Rev       | <u>CACAATCTTTATCCATTAATTAACCTCCAAAATACC</u>      |
| SNAP_SOE_Fw       | ATGGATAAAGATTGTGAAATGAAGAGAACC                   |
| XhoI_SNAP_Rev     | <u>CCGCTCGAGTTACCCAAGTCCTGGTTTCCCAAACG</u>       |
| CDspo0A_598D      | <u>GCTAGGATCCTTAATGGGTAATTC</u>                  |
| CDspo0A_SNAP_Rev  | CCCCATTA AAAA <u>ACTCGAGTCTTATTACAGA</u>         |
| CD25890 970D      | <u>GGAATTC</u> CATATGTGAAGGTATTTTGGAGG           |
| CD25890 1920R     | ATAAGAAT <u>GCGGCCGCC</u> CACAAACATTTAAGCATTCCCC |
| CD25890_BamHI_Fw  | <u>CGGGATCCGATGGCTATAAGTATGACTGG</u>             |
| CD25890_NotI_Rev  | <u>GCGGCCGCTTACTCTATATTTTGTATTTGTTC</u>          |
| IMV503            | <u>CCC</u> GAGCTCTAATCTAAAGTGGAGGGATA            |
| IMV505            | <u>C</u> CGGATCCTACTCATTAGCACTATAAGACAAT         |

Underlined sequences represent introduced restriction sites.

**Table S7. Plasmids used in this study.**

| Plasmid   | Relevant genotype                                                                                                 | Origin    |
|-----------|-------------------------------------------------------------------------------------------------------------------|-----------|
| pFT47     | pMTL84121- <i>SNAP<sup>Cd</sup></i> (Cm <sup>R</sup> /Tm <sup>R</sup> )                                           | 6         |
| pMTL84121 | <i>Clostridia</i> modular plasmid; <i>catP</i> (Cm <sup>R</sup> /Tm <sup>R</sup> )                                | 7         |
| pMTL-YN3  | Plasmid for mutant construction through ACE methodology (Cm <sup>R</sup> /Tm <sup>R</sup> )                       | 5         |
| pMTL-YN1  | Plasmid for $\Delta$ <i>pyrE</i> reversion through ACE methodology (Cm <sup>R</sup> /Tm <sup>R</sup> )            | 5         |
| pMTL-YN1C | Plasmid for <i>in trans</i> complementation of mutants (Cm <sup>R</sup> /Tm <sup>R</sup> )                        | 5         |
| pMLD138   | pMTL-YN3- <i>P<sub>tet</sub></i> - <i>spo0A</i>                                                                   | 8         |
| pRPF185   | Plasmid with the tetracycline-inducible promoter <i>P<sub>tet</sub></i>                                           | 9         |
| pAM25     | pMTL84121 - <i>P<sub>tet</sub></i>                                                                                | This work |
| pAM37     | pMTL-YN3 containing homology regions for $\Delta$ <i>CD25890</i> construction (Cm <sup>R</sup> /Tm <sup>R</sup> ) | "         |
| pAM38     | pMTL-YN1C containing <i>CD25890</i> (Cm <sup>R</sup> /Tm <sup>R</sup> )                                           | "         |
| pDIA5972  | pRPF185 containing <i>sinRR'</i> (Cm <sup>R</sup> /Tm <sup>R</sup> )                                              | "         |
| pDM35     | pETDuet-1- <i>CD25890</i> (Amp <sup>R</sup> )                                                                     | "         |
| pMS463    | pFT47- <i>P<sub>spo0A</sub></i> - <i>SNAP<sup>Cd</sup></i> (Cm <sup>R</sup> /Tm <sup>R</sup> )                    | "         |



## Supplementary References

- 1 Abecasis, A. B. *et al.* A genomic signature and the identification of new sporulation genes. *J Bacteriol* **195**, 2101-2115, doi:JB.02110-12 [pii] 10.1128/JB.02110-12 (2013).
- 2 Browne, H. P. *et al.* Culturing of 'unculturable' human microbiota reveals novel taxa and extensive sporulation. *Nature* **533**, 543-546, doi:10.1038/nature17645 (2016).
- 3 Saujet, L., Monot, M., Dupuy, B., Soutourina, O. & Martin-Verstraete, I. The key sigma factor of transition phase, SigH, controls sporulation, metabolism, and virulence factor expression in *Clostridium difficile*. *J Bacteriol* **193**, 3186-3196, doi:JB.00272-11 [pii] 10.1128/JB.00272-11 (2011).
- 4 Kuehne, S. A. *et al.* The role of toxin A and toxin B in *Clostridium difficile* infection. *Nature* **467**, 711-713, doi:nature09397 [pii] 10.1038/nature09397 (2010).
- 5 Ng, Y. K. *et al.* Expanding the repertoire of gene tools for precise manipulation of the *Clostridium difficile* genome: allelic exchange using pyrE alleles. *PLoS One* **8**, e56051, doi:10.1371/journal.pone.0056051 PONE-D-12-24523 [pii] (2013).
- 6 Pereira, F. C. *et al.* The spore differentiation pathway in the enteric pathogen *Clostridium difficile*. *PLoS Genet* (2013).
- 7 Heap, J. T., Pennington, O. J., Cartman, S. T. & Minton, N. P. A modular system for *Clostridium* shuttle plasmids. *J Microbiol Methods* **78**, 79-85, doi:10.1016/j.mimet.2009.05.004 (2009).
- 8 Dembek, M. *et al.* Inducible Expression of spo0A as a Universal Tool for Studying Sporulation in *Clostridium difficile*. *Front Microbiol* **8**, 1793, doi:10.3389/fmicb.2017.01793 (2017).
- 9 Fagan, R. P. & Fairweather, N. F. *Clostridium difficile* has two parallel and essential Sec secretion systems. *J Biol Chem* **286**, 27483-27493, doi:10.1074/jbc.M111.263889 (2011).

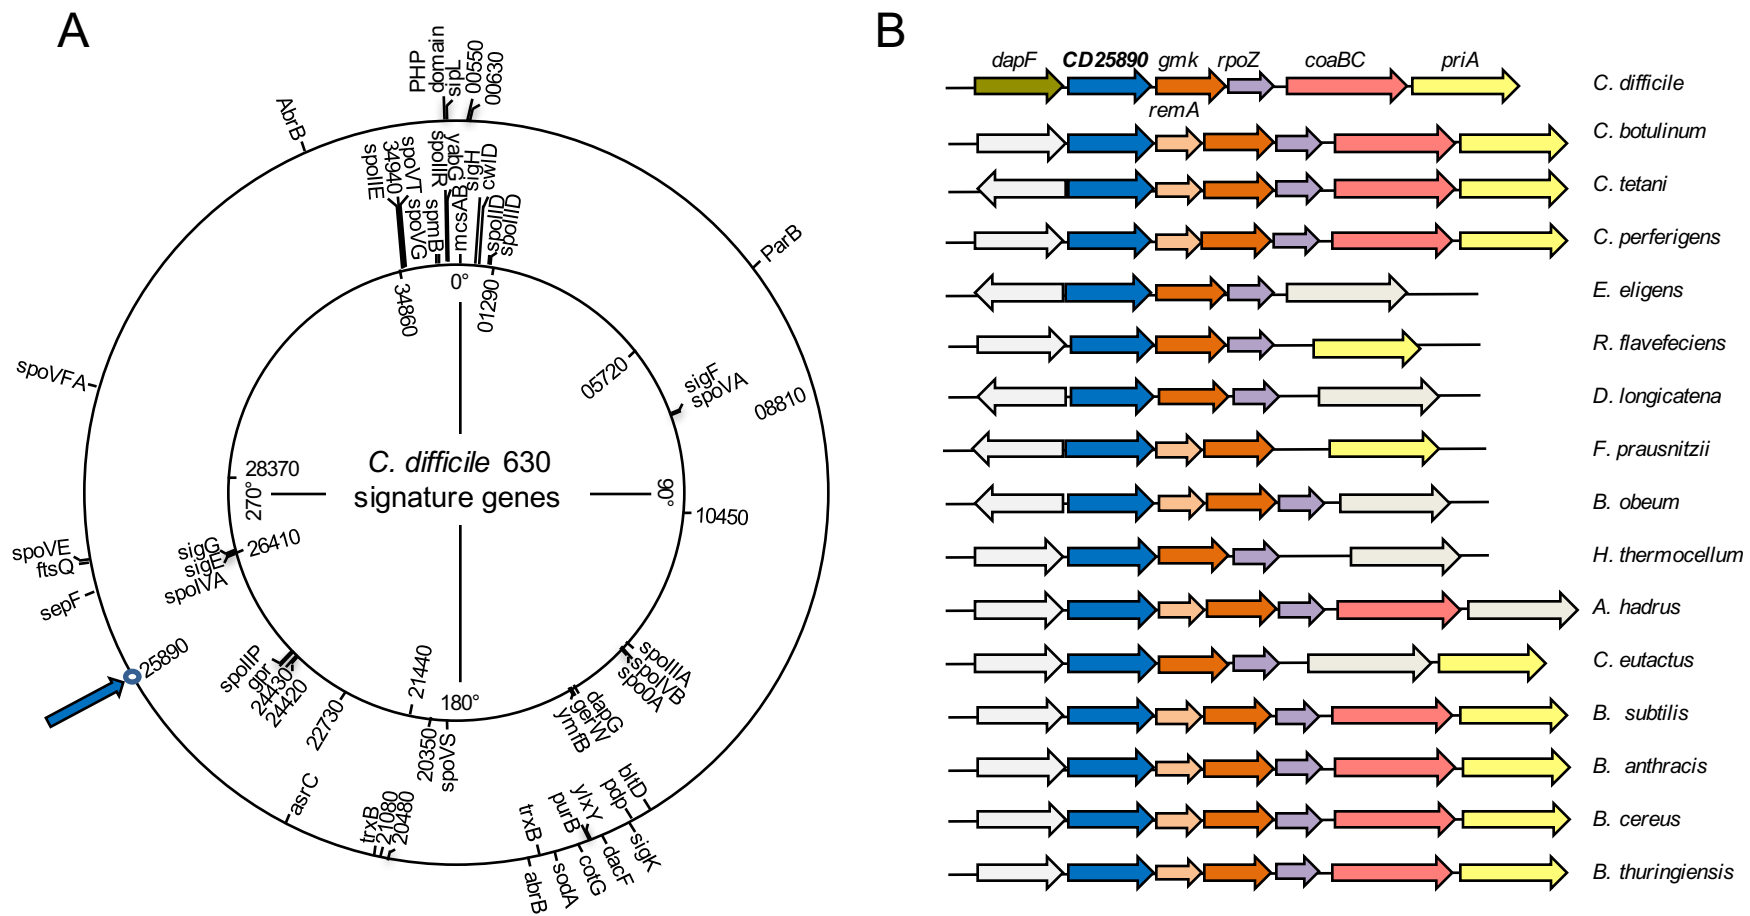

**A**

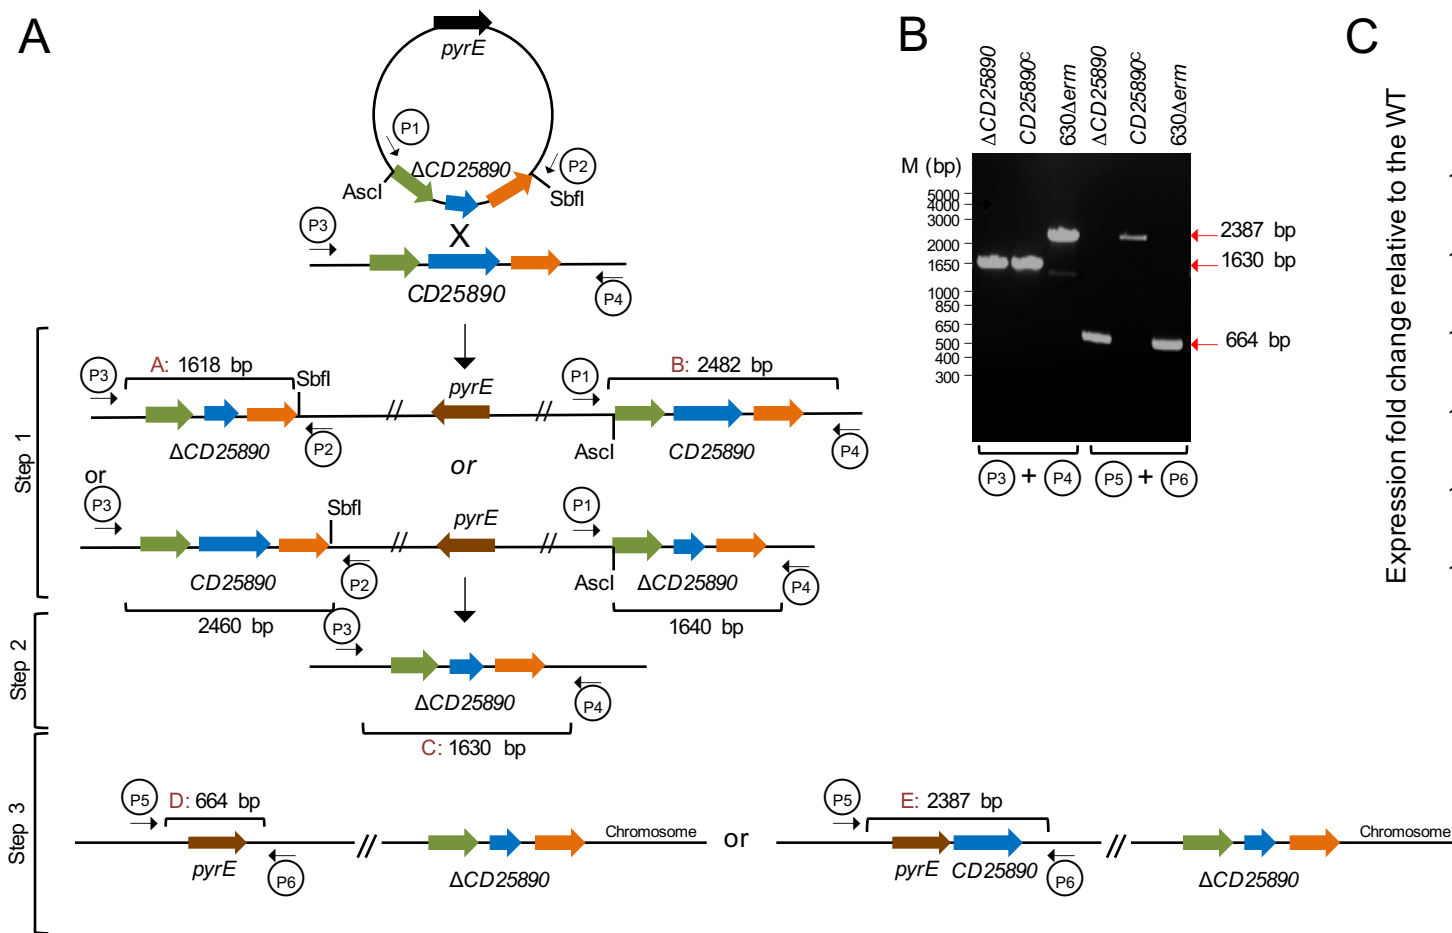

**B**

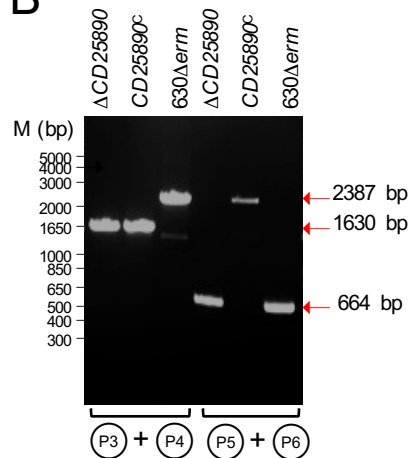

**C**

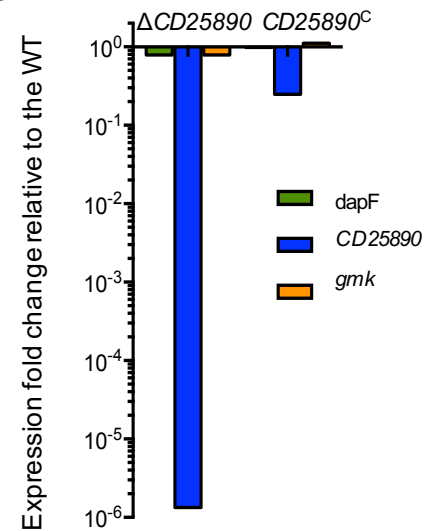

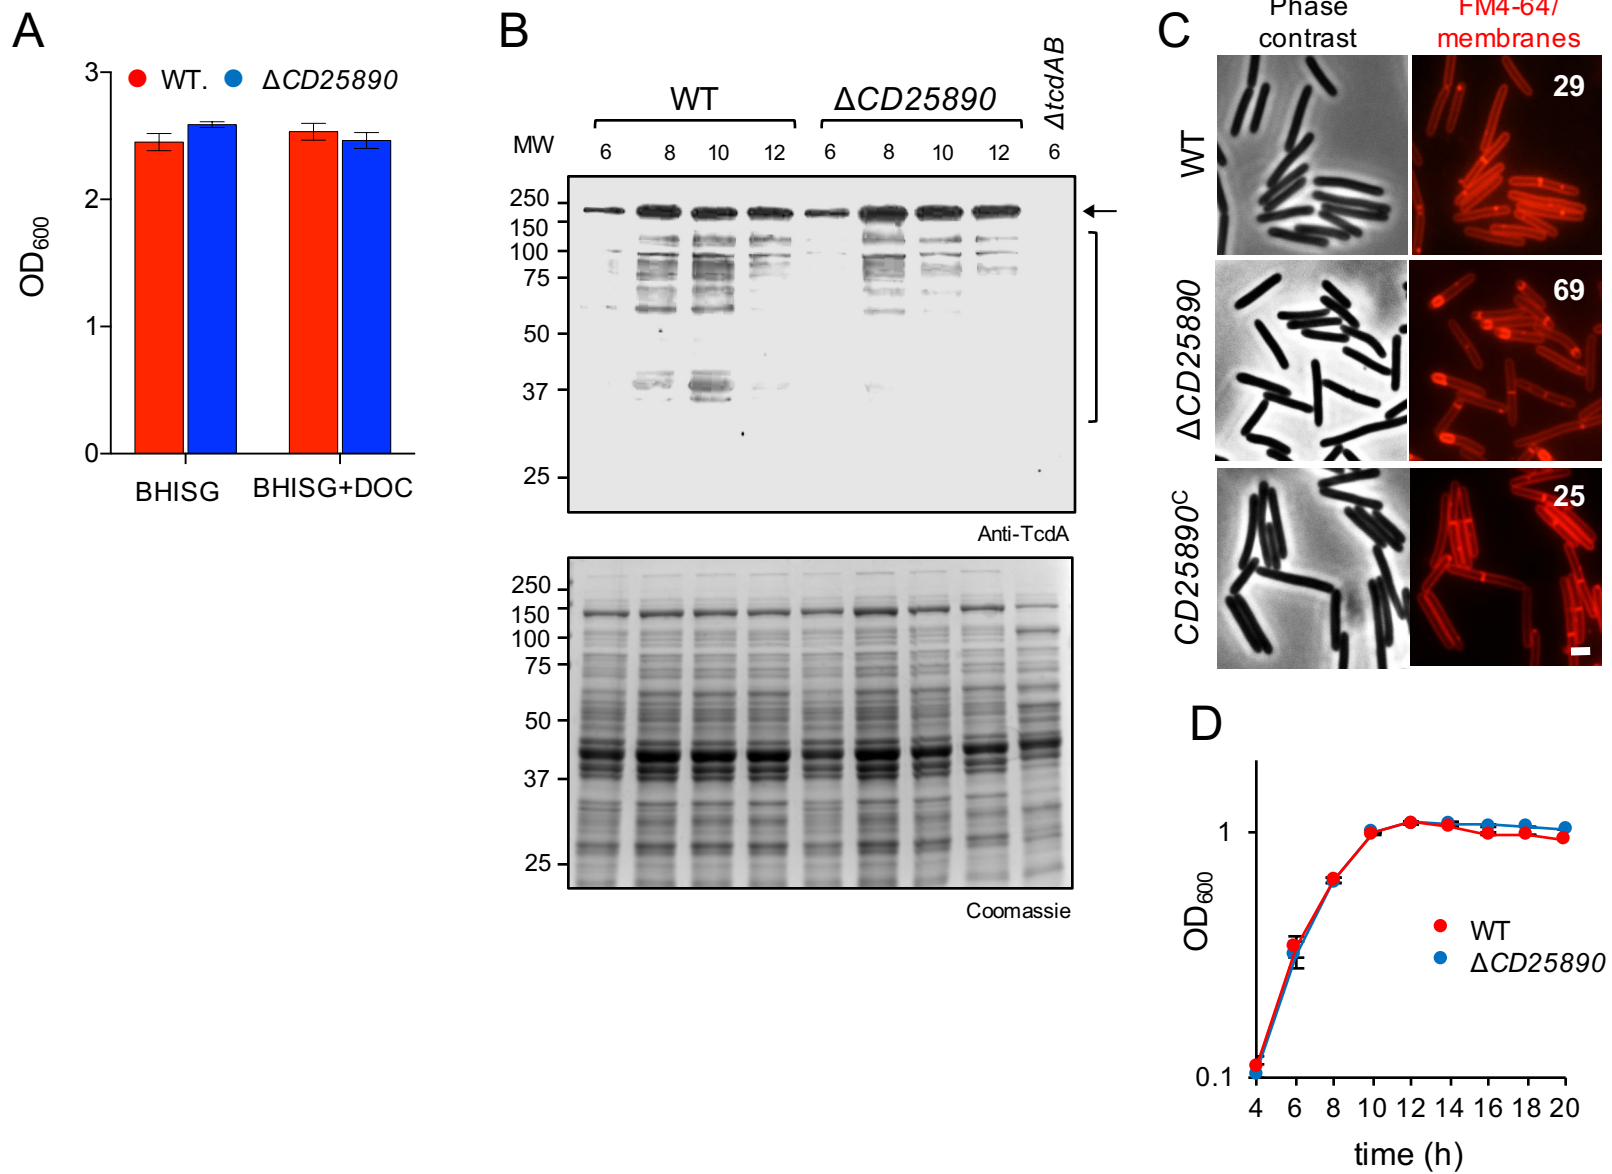

Martins *et al.* – Figure S4

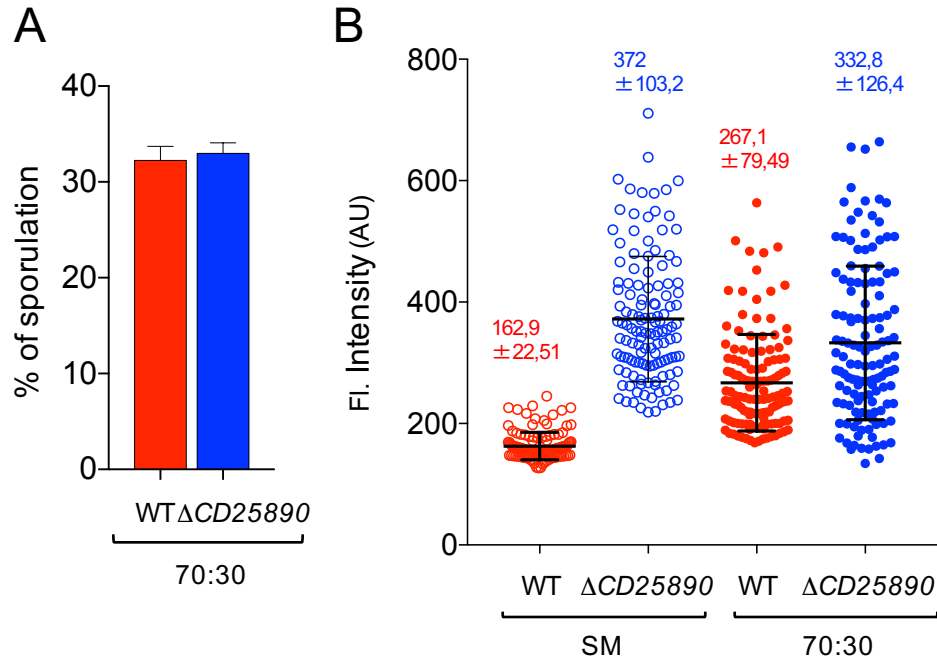

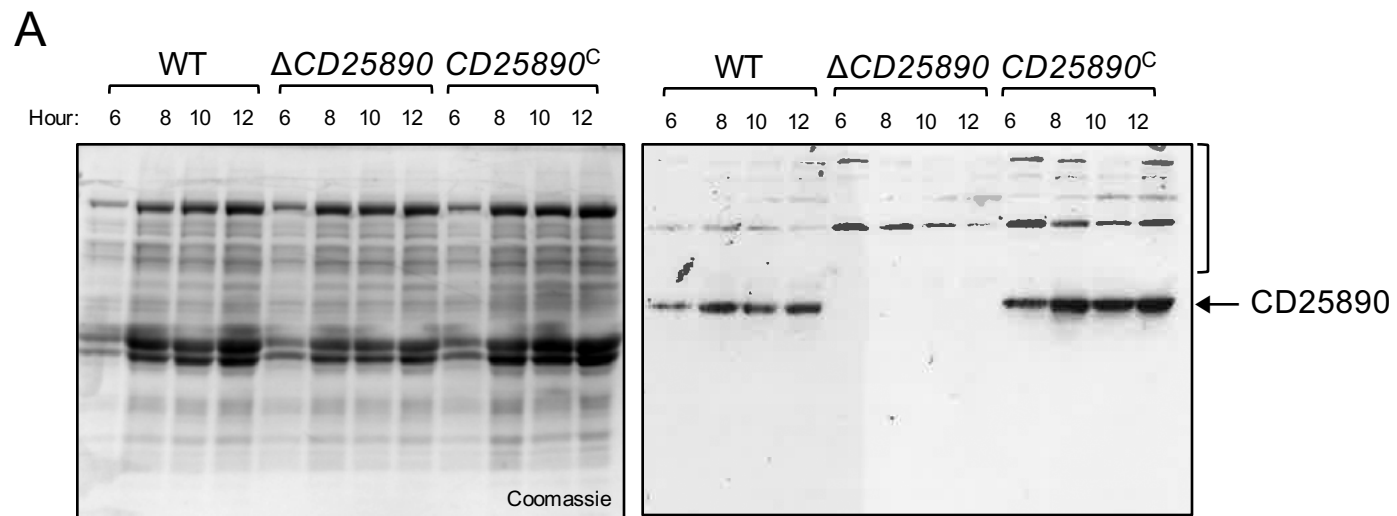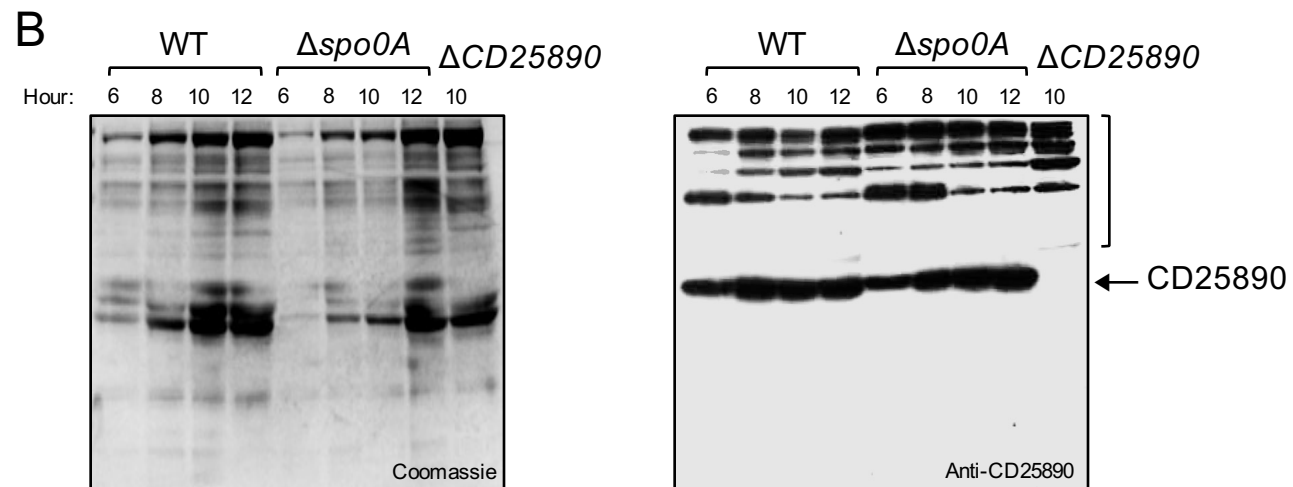

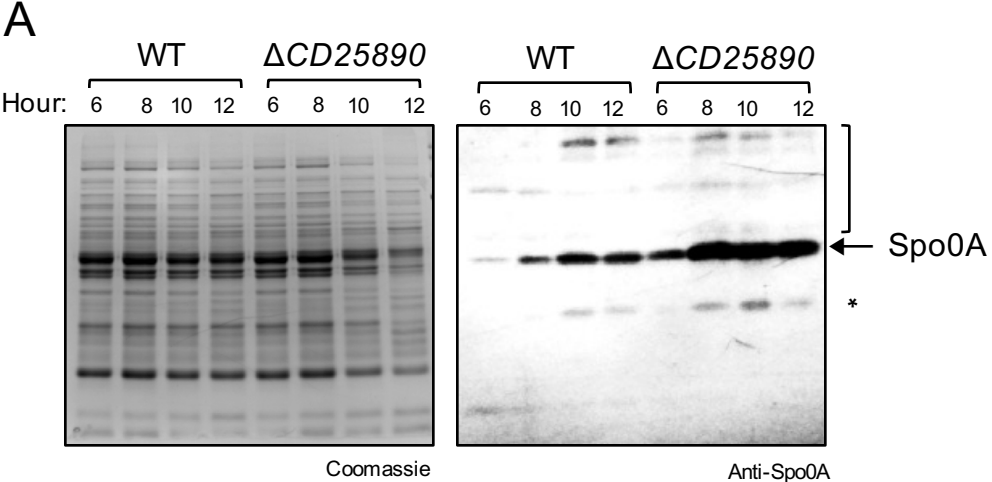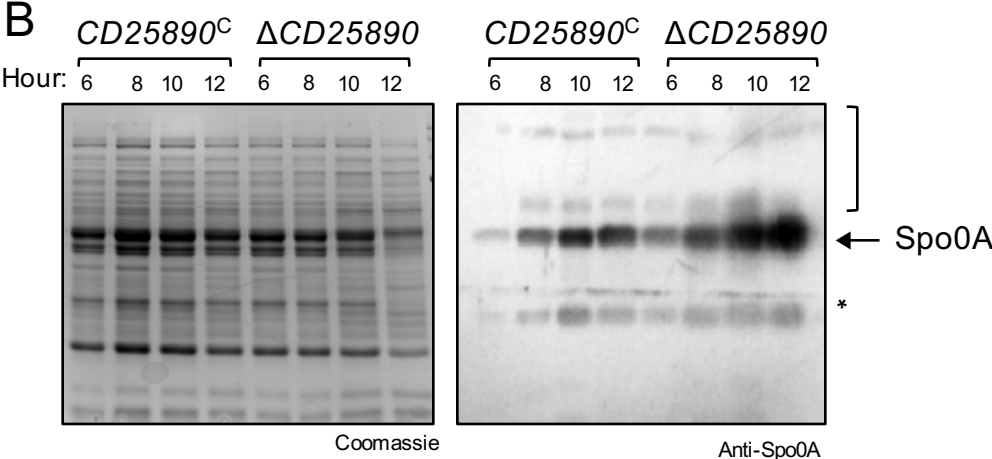

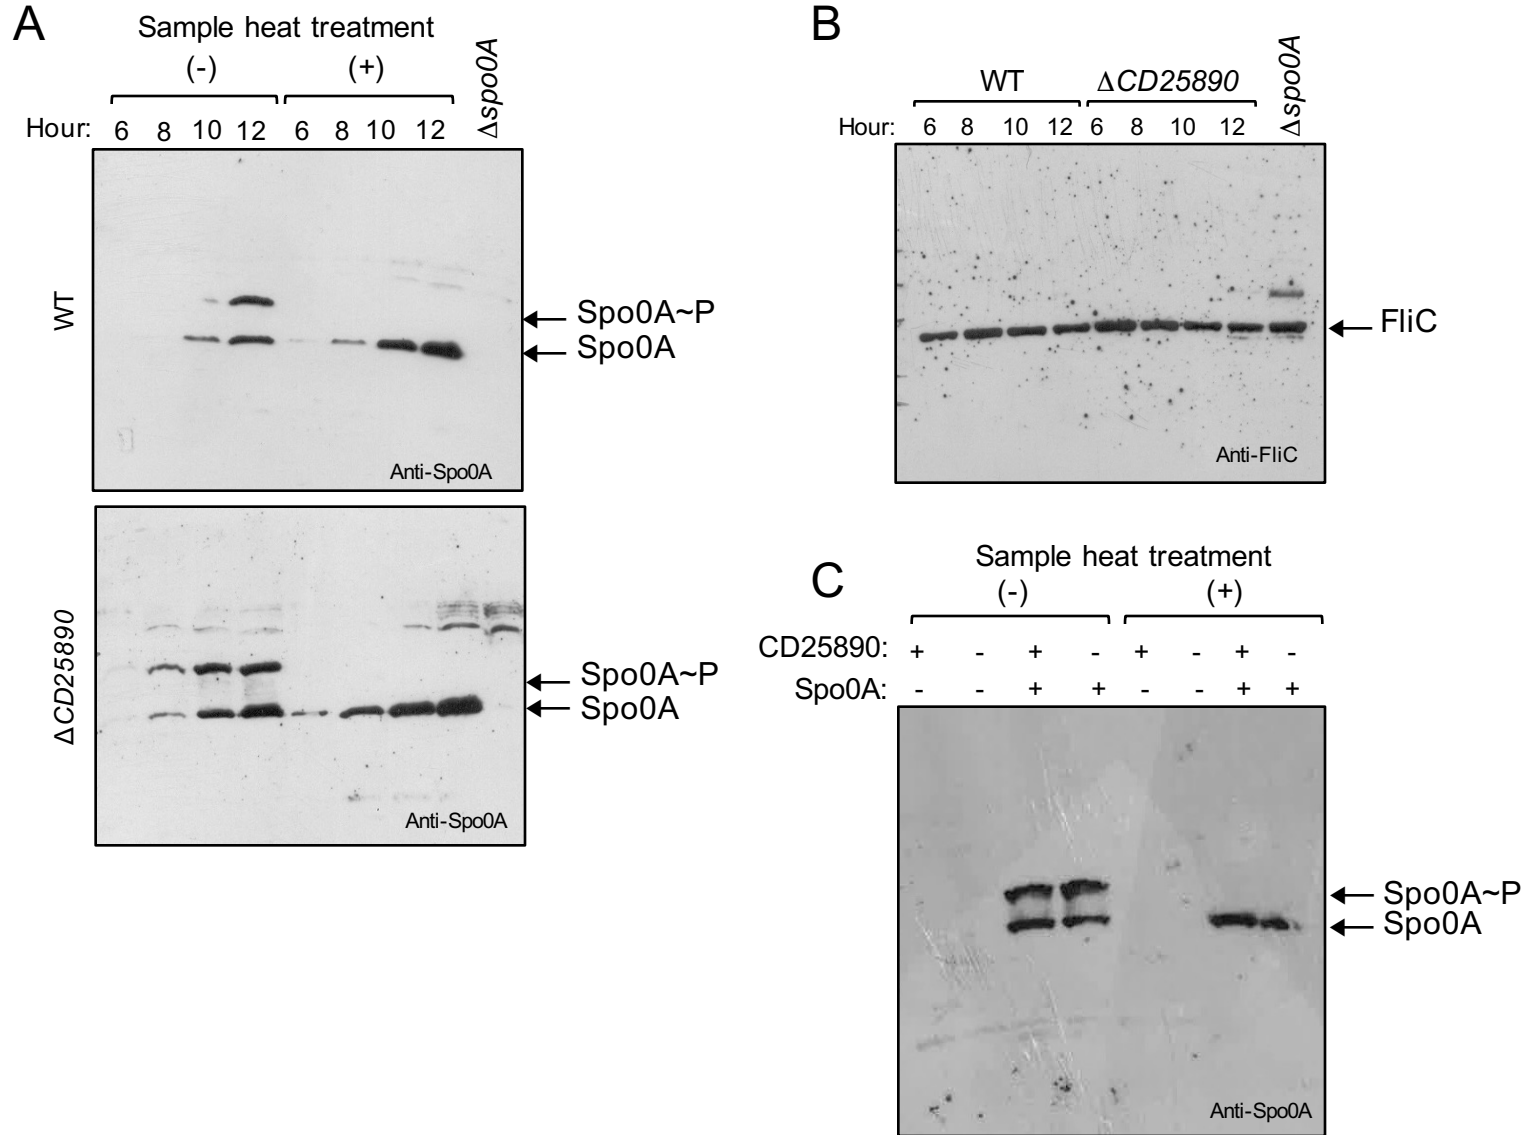

Supplement: 41598_2021_86878_MOESM1_ESM.pdf [file 41598_2021_86878_MOESM1_ESM.pdf]
